# Supplementary material for: Bmp4 Synexpression Gene, Sizzled, Transcription Is Collectively Modulated by Smad1 and Ventx1.1/Ventx2.1 in Early Xenopus Embryos
Source: MDPI journal article supplement (doi:10.3390/ijms232113335), 2022-11-01
Supplement: s1 [file s1]

## Supplementary Figure S1

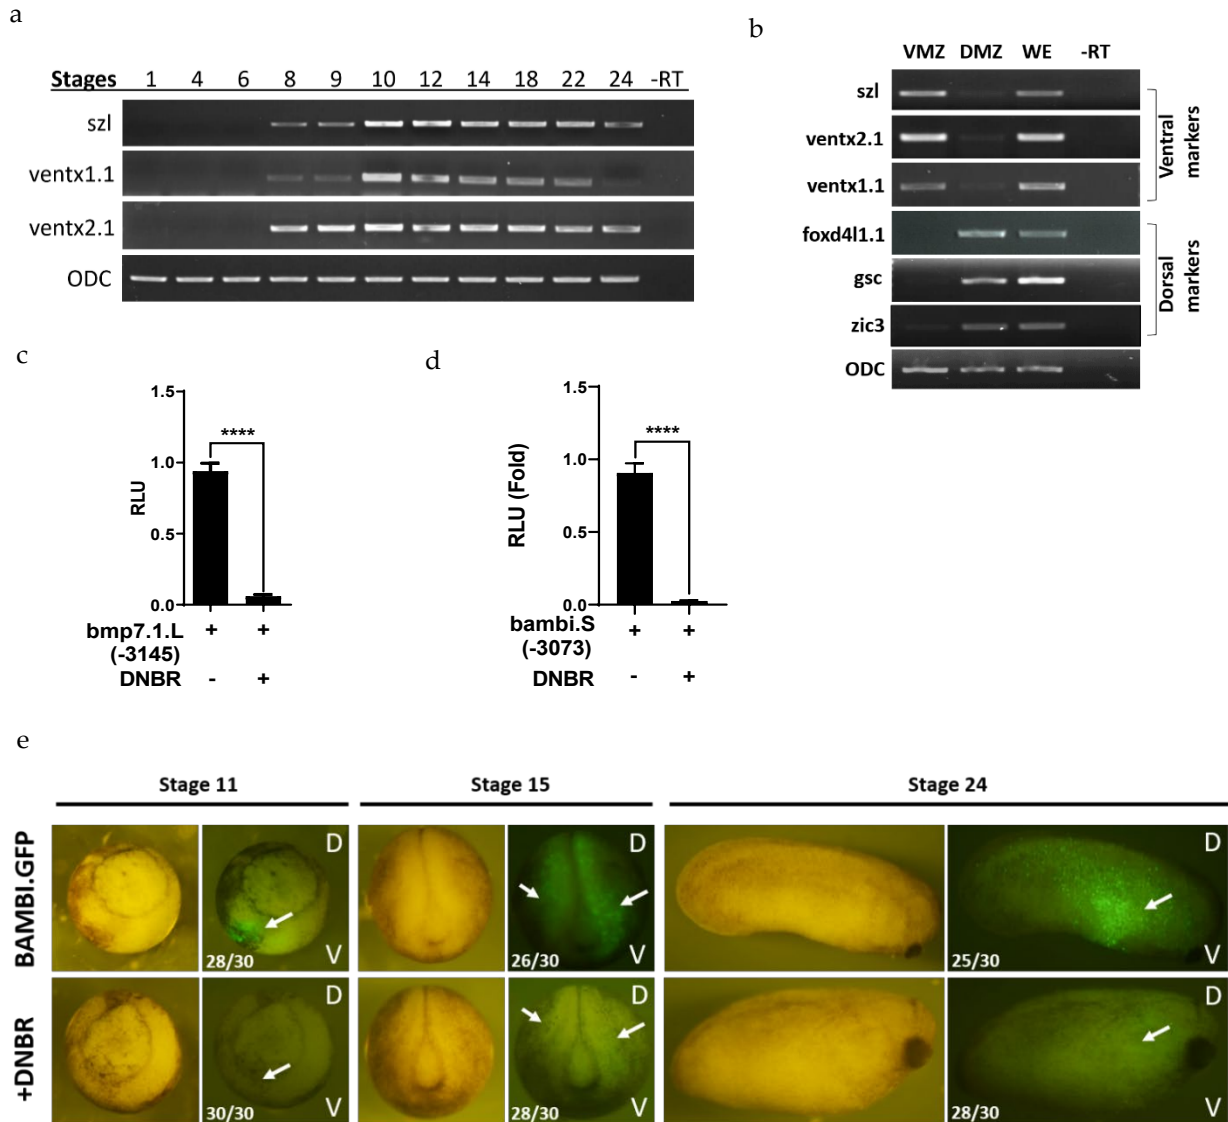

**Figure S1.** Spatio-temporal expression pattern of *szl* and Bmp4 modulated promoter activities of synexpression genes. (a) Developmental expression of *szl* and *ventx* family transcription factors. (b) Dorso-ventral distribution of representative marker genes. (c and d) *Bmp7.1.L* (-3145).*luc*<sup>+</sup> and *bambi.S* (-3073).*luc*<sup>+</sup> promoters respectively were injected with and without *dnbr* mRNA at 1 cell stage of *Xenopus laevis* embryos to measure relative reporter gene activities. (c and d) Unpaired two-tailed Student's *t*-test or ANOVA were applied for statistical analysis.  $p \leq 0.0001$  for \*\*\*\*, ns(non-significant) were the assignments for significance.

(e) The *bambi(-3073).eGFP* promoter were injected with and without *dnbr* mRNAs to visualize fluorescence at developmental stages 11, 15 and 24 and the number of embryos are indicated in the down left corner.

## Supplementary Figure S2.

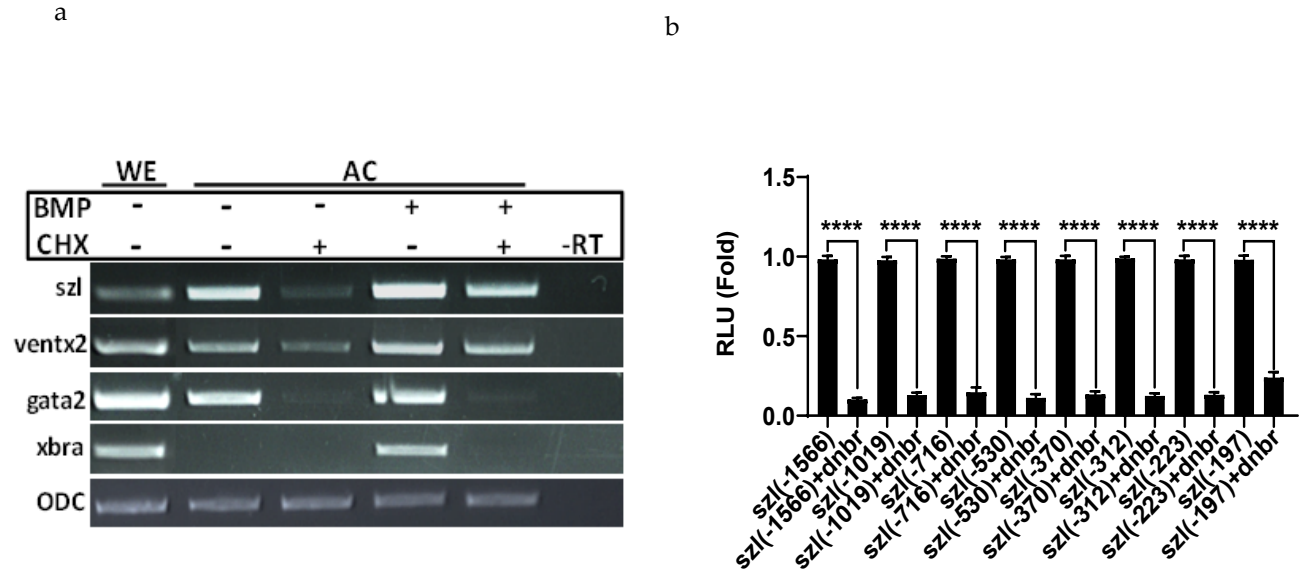

**Figure S2. Bmp4 signaling directly targets *szl* gene expression during gastrulation.**

(a) RT-PCR of ventral specific genes including *szl* expression in the animal cap explants treated with *bmp4* mRNA, cycloheximide and combination to check the direct and indirect targets of Bmp4 signaling.

(b) Relative reporter gene assay was performed from *Xenopus* embryos treated with *szl* serially deleted constructs alone and in combination with *dnbr* mRNA.  $p \leq 0.0001$  for \*\*\*\*, ns(non-significant) were the assignments for significance.

Supplementary Figure S3.

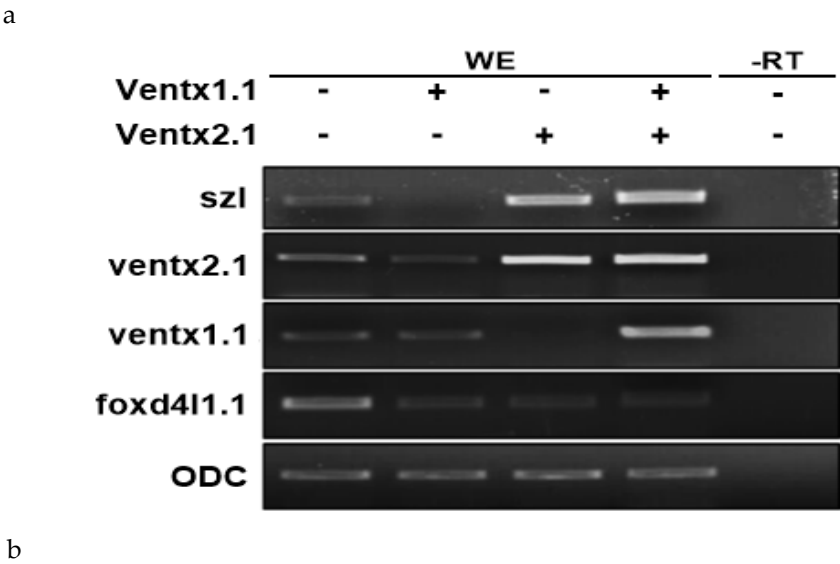

**Szl.L (-370)**

TACCACAATGCAGTCTGCCCAGTGGACCCAGGAGACAGCCTGTCTGCCCATGT  
ACATTTCTCCACATGTTACACTCCATTACATAACAACACTCCAATTTGTCCCTTT  
TTAATATCCAAGTGTCCACATACAGCATAACAGCCTGCCGTCCGTAACATAATGAA  
ATCTCCTATGTAAATCACCTTTCAAGGAGAGTCTGCCGTGCCTGTGTCTCCACC  
TCTCACTTATCACAAACATCGCCTGAATGGGCAGTGAGCTGAGCCCGGCCTGT  
CTCTCCGCTGTCTTGATAAGCGACAGATAATGAGGGGCCTCCTGTATATAAGGC  
GCTTCCCGGCCACACTGGCAGTAGCTCAGCACTTGCTGCAAAC ATG

BRE (TCTG) -325 ~ -328 from translation start site (TLS, ATG)  
VRE (TAAATT) -191 ~ -196 from translation start site (TLS, ATG)

**Figure S3.** One VRE site (work as a secondary BRE site) is required for Ventx1.1/Ventx2.1 mediated *szl* transcriptional regulation. (a) Ventx1.1 and Ventx2.1 negatively and positively regulate *szl* transcription respectively while together ventx1.1/2.1 over expression enhances the *szl* transcription in whole embryo during early gastrulation. (b) Bmp4/Smad1 response elements (BRE) and Ventxs response elements (VRE) are highlighted in *szl*(-370) construct.

## TABLES

Table S1. Primers list used to clone *szl*, *bmp7.1* and *bambi* promoters

| Primers name   | Product size (bp)     | Nucleotide sequence (5'-3')                     |
|----------------|-----------------------|-------------------------------------------------|
| <b>Forward</b> | <i>szl</i> (-1566)    | 5'-CGC <u>GGTACCT</u> TTCCACTAGAGACCACTACAA-3'  |
| =              | (-1019)               | 5'-GCG <u>GCTAGCA</u> ATGACATCAGAACTCACCGT-3'   |
| =              | (-716)                | 5'-GCG <u>GCTAGC</u> ATTGGGCAGTTTTGAAAATAC-3'   |
| =              | (-530)                | 5'-GCG <u>GCTAGCT</u> GAGCTGCTGCTTGGAGCTGA-3'   |
| =              | (-370)                | 5'-GCG <u>GCTAGCT</u> TACCACAATGCAGTCTGCCCA-3'  |
| =              | (-312)                | 5'-CGC <u>GCTAGCT</u> TCTCCACATGTTACACTCCATT-3' |
| =              | (-223)                | 5'-CGC <u>GCTAGCC</u> GTCCGTAATAATGAAATCTC-3'   |
| =              | (-197)                | 5'-GCG <u>GCTAGCG</u> TAAATTCACCTTTCAAGGAG-3'   |
| <b>Reverse</b> | -                     | 5'-CGC <u>CTCGAG</u> GCAAGTGCTGAGCTACTGCCA-3'   |
| <b>Forward</b> | <i>bmp7.1</i> (-3143) | 5'-CGC <u>GGTACC</u> GCGCCAAGGCAGAAATCACGA-3'   |
| <b>Reverse</b> | -                     | 5'-GGG <u>CTCGAG</u> CCCCTGGATCTGTACGGCAAA-3'   |
| <b>Forward</b> | <i>bambi</i> (-3073)  | 5'-CGC <u>GGTACC</u> GAAGAGCCGAATTTCTGGGTT-3'   |
| <b>Reverse</b> | -                     | 5'-CGC <u>GCTAGCC</u> GGATTTCAAGCCTTGATCGTG-3'  |

**Table S2. List of marker genes primers used for RT-PCR amplification**

| <b>Markers name</b> | <b>Nucleotide sequence (5'-3')</b>                                             | <b>Annealing Temp.(°C)</b> |
|---------------------|--------------------------------------------------------------------------------|----------------------------|
| <i>ODC</i>          | F-5'-GCCATTGTGAAGACTCTCTCCA-3'<br>R-5'-TCCAGAAGCAGCCTGCTTGTTT-3'               | 55°C                       |
| <i>Szl</i>          | F-5'-CCAAGTGC GTTCCCATTCCCAA-3'<br>R-5'-TGGCAGCTTGGCTTTGGCAGTT-3'              | 60°C                       |
| <i>Ventx1.1</i>     | F-5'-CCTTCAGCATGGTTCAACAG-3'<br>R-5'-CATCCTTCTTCCTTGGCATCTCCT-3'               | 57°C                       |
| <i>Ventx2.1</i>     | F-5'CTACAGCACTAGCACTGACTCAGG-3'<br>R-5'TTGGACTGCATGCTGCAATACAGG-3'             | 57°C                       |
| <i>Xbra</i>         | F-5'-GACAACCACCGCTGGAAGTAT-3'<br>R-5'-GCGGTCAC TGCTATGAACTGT-3'                | 60°C                       |
| <i>Foxd4l1.1</i>    | F-5'-GGCTCATTACCCAGACCAGG-3'<br>R-5'-AGAGGGCCAGTGGATAGGTT-3'                   | 52°C                       |
| <i>Gata2</i>        | F-5'- GAA CTT TCC AGG TGC ATG CAG -3'<br>R-5'- CCG AGG TGC AAA TTA TTA TGT -3' | 57°C                       |

Table S3. List of BRE and VRE site directed mutagenesis primers

| Primers name           | Nucleotides sequence (5'- 3')                                                                             |
|------------------------|-----------------------------------------------------------------------------------------------------------|
| <i>Szl</i> (-370) mBRE | F-5'-CAGGAGACAGCCTGTT <u>GG</u> CCCATGTACATTTC-3'<br>R-5'-GAAATGTACATGGG <u>CA</u> ACAGGCTGTCTCCTG-3'     |
| <i>Szl</i> (-370) mVRE | F-5'-GAAATCTCCTATGTAG <u>GGG</u> TCACCTTTCAAGGAG-3'<br>R-5'-CTCCTTGAAAGGTGA <u>CCCT</u> ACATAGGAGATTTC-3' |

Table S4. ChIP-PCR primers

| Primers name                    | Nucleotides sequence (5'- 3')                                                   | Annealing Temp.(°C) |
|---------------------------------|---------------------------------------------------------------------------------|---------------------|
| <b>ChIP-PCR primers (370bp)</b> | F-5'GCGGCTAGCTACCACAATGCAGTCTGCCCA-3'<br>R-5'-GCGCTAGCGGATTTC AAGCCTTGATCGTG-3' | 54°C                |
